# Supplementary material for: Progress of the COVID-19: Persistence, Effectiveness, and Immune Escape of the Neutralizing Antibody in Convalescent Serum
Source: MDPI journal article supplement (doi:10.3390/pathogens11121531), 2022-12-13
Supplement: s1 [file s1]

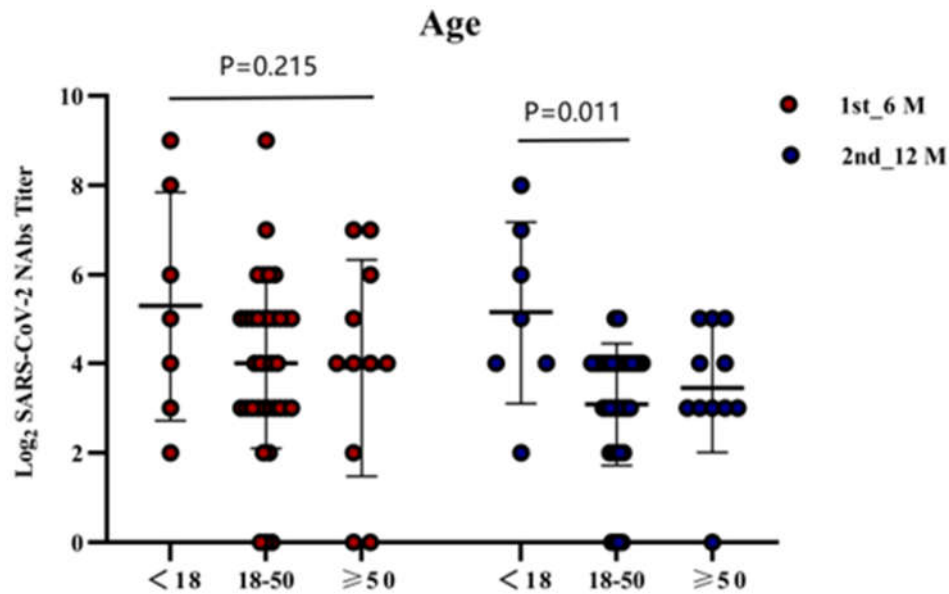

**Figure S1.** NAb titers distribution of different ages at two intervals. NAb titers were log<sub>2</sub> processed. *P* values were determined with a two-tailed One-way ANOVA. NAb: neutralizing antibodies; ANOVA: analysis of variance.

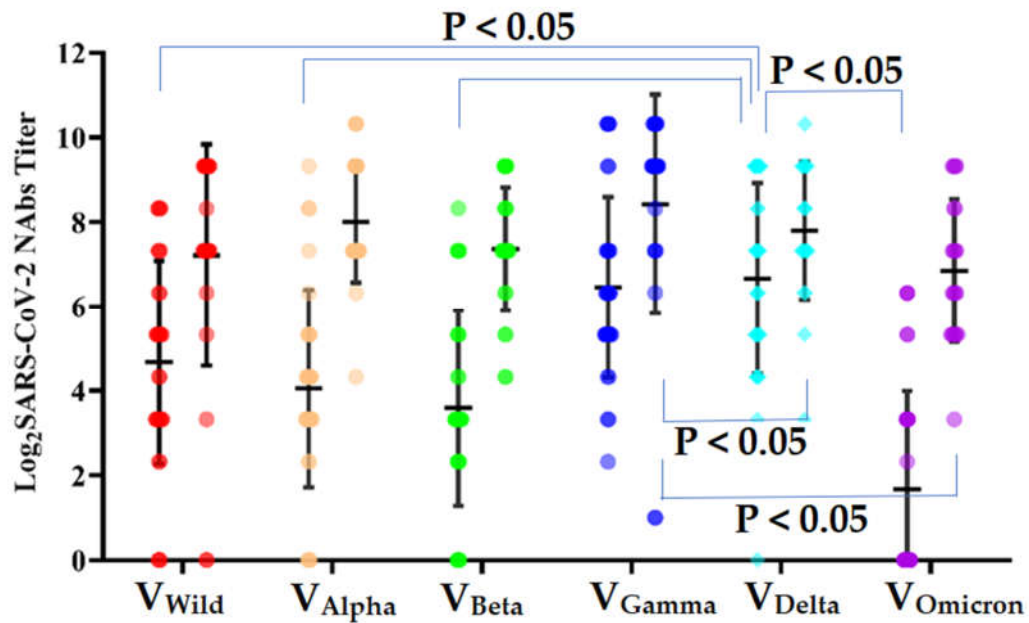

**Figure S2.** The NAb titers in the cross-reactive test. The first and second columns of each horizontal coordinate point presented *S*<sub>Delta</sub> and *S*<sub>Omicron</sub>, respectively. NAb titers were log<sub>2</sub> processed. *p* values were determined with a student's *t*-test. NAb: neutralizing antibodies.
